# Supplementary material for: Lineage-Selective Disturbance of Early Human Hematopoietic Progenitor Cell Differentiation by the Commonly Used Plasticizer Di-2-ethylhexyl Phthalate via Reactive Oxygen Species: Fatty Acid Oxidation Makes the Difference
Source: MDPI journal article supplement (doi:10.3390/cells10102703), 2021-10-09
Supplement: s1 [file s1]

## Supplementary Material

### **Lineage-Selective Disturbance of Early Human Hematopoietic Progenitor Cell Differentiation by the Commonly Used Plasticizer di-2-ethylhexyl Phthalate via Reactive Oxygen Species: Fatty Acid Oxidation Makes the Difference**

Lars Kaiser<sup>1,2</sup>, Isabel Quint<sup>1</sup>, René Csuk<sup>3</sup>, Manfred Jung<sup>2,4</sup> and Hans-Peter Deigner<sup>1,5,6\*</sup>

<sup>1</sup>Institute of Precision Medicine, Furtwangen University, Jakob-Kienzle-Straße 17, D-78054 Villingen-Schwenningen, Germany; <sup>2</sup>Institute of Pharmaceutical Sciences, University of Freiburg, Albertstraße 25, D-79104 Freiburg i. Br., Germany; <sup>3</sup>Organic Chemistry, Martin-Luther-University Halle Wittenberg, Kurt-Mothes-Str. 2, D-06120 Halle (Saale), Germany; <sup>4</sup>CIBSS – Centre for Integrative Biological Signalling Studies, University of Freiburg; <sup>5</sup>Fraunhofer Institute IZI, Leipzig, EXIM Department, Schillingallee 68, D-18057 Rostock, Germany; <sup>6</sup>Associated member of Tuebingen University, Faculty of Science, Auf der Morgenstelle 8, D-72076 Tübingen, Germany

**\* Corresponding author:** Prof. Dr. Hans-Peter Deigner, [hans-peter.deigner@hs-furtwangen.de](mailto:hans-peter.deigner@hs-furtwangen.de), Phone: +49 7720 307-4232, Fax: +49 7720 307 4725, Institute of Precision Medicine, Furtwangen University, Jakob-Kienzle-Straße 17, 78054 Villingen-Schwenningen, Germany

**Supplemental Table S1.** Reagents and Sources.

| Reagent                                         | Supplier                       | Identifier        |
|-------------------------------------------------|--------------------------------|-------------------|
| Mouse monoclonal anti-CD71-FITC                 | Beckton Dickinson GmbH         | Cat#555536        |
| Mouse monoclonal anti-CD235a-APC                | Beckton Dickinson GmbH         | Cat#561775        |
| Mouse monoclonal anti-CD14-Pacific Blue         | Beckton Dickinson GmbH         | Cat#558121        |
| Mouse IgG2ak-FITC                               | Beckton Dickinson GmbH         | Cat#553456        |
| Mouse IgG2bk-APC                                | Beckton Dickinson GmbH         | Cat#555745        |
| Mouse IgG2ak-Pacific Blue                       | Beckton Dickinson GmbH         | Cat#558118        |
| Mouse monoclonal anti-AhR (A-3)                 | Santa Cruz Biotechnology, Inc. | Cat#sc-133088     |
| Mouse monoclonal anti-CYP1A1 (A-9)              | Santa Cruz Biotechnology, Inc. | Cat#sc-393979     |
| Mouse monoclonal anti-CYP1B1 (G-4)              | Santa Cruz Biotechnology, Inc. | Cat#sc-374228     |
| Mouse monoclonal anti- $\beta$ -actin (AC-74)   | Sigma-Aldrich                  | Cat#A2228         |
| Donkey polyclonal anti-mouse IgG H&L-HRP        | Abcam                          | Cat#ab6820        |
| Human male AB serum                             | Sigma-Aldrich                  | Cat#H4522         |
| Fetal Bovine Serum                              | Sigma-Aldrich                  | Cat#F7524         |
| Valproic acid                                   | Fisher Scientific              | Cat#10077682      |
| BML-210                                         | ApexBio Technology LCC         | Cat#B5968         |
| Stemregenin 1 (SR1)                             | ApexBio Technology LCC         | Cat#A8224         |
| Fms-related tyrosin kinase 3 ligand (Flt-3L)    | GeneScript                     | Cat#Z02926        |
| Interleukin-3 (IL-3)                            | GeneScript                     | Cat#Z02991        |
| Interleukin-6 (IL-6)                            | GeneScript                     | Cat#Z03134        |
| Interleukin-15 (IL-15)                          | GeneScript                     | Cat#Z00377        |
| Thrombopoietin (TPO)                            | GeneScript                     | Cat#Z03434        |
| Stem cell factor (SCF)                          | GeneScript                     | Cat#Z02692        |
| Erythropoietin (EPO)                            | GeneScript                     | Cat#Z02975        |
| Etomoxir                                        | VWR International              | Cat#236020        |
| H2DCFDA                                         | VWR International              | Cat#D6883         |
| Troglitazone                                    | VWR International              | Cat#ALEXBML-GR210 |
| Fenofibrate                                     | VWR International              | Cat#CAYM10005368  |
| Etomoxir                                        | VWR International              | Cat#236020        |
| GW9662                                          | VWR International              | Cat#ALEXBML-GR234 |
| GW6471                                          | VWR International              | Cat#CAYM11697     |
| Di-2-ethylhexyl phthalate (analytical standard) | Sigma-Aldrich                  | Cat#36735         |
| Phthalic acid mono-2-ethylhexyl ester           | Sigma-Aldrich                  | Cat#796832        |
| Mono-2-ethylhexyl phthalate-d4                  | Fisher Scientific GmbH         | Cat#15990252      |
| Di-2-ethylhexyl phthalate-d4                    | Sigma Aldrich                  | Cat#617180        |
| 2-Ethyl-1-hexanol                               | Sigma-Aldrich                  | Cat#538051        |
| Phenylmethanesulfonylfluoride                   | Sigma-Aldrich                  | Cat#78830         |
| 2,3,4,5,6-Pentafluorobenzylbromide              | Sigma-Aldrich                  | Cat#101052        |
| B-Glucuronidase                                 | Sigma-Aldrich                  | Cat#3707598001    |
| Pefabloc SC                                     | Sigma-Aldrich                  | Cat#11429868001   |
| PhosSTOP                                        | Sigma-Aldrich                  | Cat#4906845001    |

|                                                                                                  |                                |                        |
|--------------------------------------------------------------------------------------------------|--------------------------------|------------------------|
| Ethanol (LC-MS grade)                                                                            | Sigma-Aldrich                  | Cat#111727100          |
| Sphingosine d17:1                                                                                | Avanti Polar Lipids            | Cat#860640             |
| Sphingosine d18:1                                                                                | Avanti Polar Lipids            | Cat#860490             |
| Sphinganine d18:0                                                                                | Avanti Polar Lipids            | Cat#960498             |
| Sphingosine-1-Phosphate d17:1                                                                    | Avanti Polar Lipids            | Cat#860641             |
| Sphingosine-1-Phosphate d18:1                                                                    | Avanti Polar Lipids            | Cat#860492             |
| Sphinganine-1-Phosphate d18:0                                                                    | Avanti Polar Lipids            | Cat#860536             |
| C15 Ceramide                                                                                     | Avanti Polar Lipids            | Cat#330730             |
| C16 Ceramide                                                                                     | Avanti Polar Lipids            | Cat#860516             |
| C16 Dihydroceramide                                                                              | Avanti Polar Lipids            | Cat#860634             |
| C18 Ceramide                                                                                     | Avanti Polar Lipids            | Cat#860518             |
| C18 Dihydroceramide                                                                              | Avanti Polar Lipids            | Cat#860627             |
| C20 Ceramide                                                                                     | Avanti Polar Lipids            | Cat#860520             |
| C20 Dihydroceramide                                                                              | Santa Cruz<br>Biotechnology    | Cat#sc-210989          |
| C24 Ceramide d17:1                                                                               | Avanti Polar Lipids            | Cat#860650             |
| C24 Ceramide                                                                                     | Avanti Polar Lipids            | Cat#860524             |
| C24 Dihydroceramide                                                                              | Avanti Polar Lipids            | Cat#860628             |
| Lysosphingomyelin d18:1                                                                          | Avanti Polar Lipids            | Cat#860600             |
| Sphingomyelin d18:1/16:0                                                                         | Avanti Polar Lipids            | Cat#860585             |
| Tert-butyl hydrogenperoxide                                                                      | Fisher Scientific              | Cat#10703571           |
| Staurosporine                                                                                    | VWR International              | Cat#J62837.MA          |
| N-Acetylcysteine                                                                                 | VWR International              | Cat#A15409             |
| Butylhydroxyanisole                                                                              | Fisher Scientific              | Cat#10551291           |
| AbsoluteIDQ p180 Kit                                                                             | Biocrates Life<br>Science AG   | N/A                    |
| NucleoSpin RNA XS Kit                                                                            | Macherey-Nagel<br>GmbH&Co.KG   | Cat#740902             |
| Apo-ONE Assay                                                                                    | Promega                        | Cat#G7790              |
| ATP Detection Assay Kit - Luminescence                                                           | VWR International              | Cat#700410             |
| NADPH Assay Kit (Colorimetric)                                                                   | VWR International              | Cat#ABCAAB186031       |
| Superoxide Dismutase Activity Assay Kit (colorimetric)                                           | Abcam                          | Cat#ab65354            |
| LightCycler 480 SYBR Green I Master                                                              | Roche Diagnostics              | Cat#04707516001        |
| Human: cord blood CD34 <sup>+</sup> cells, mixed donors                                          | STEMCELL<br>Technologies GmbH  | Cat#70008.3            |
| Human: Umbilical Vein Endothelial Cells, neonatal,<br>pooled                                     | Sigma-Aldrich                  | Cat#200P-05N           |
| Human: HepG2/C3A                                                                                 | ATCC                           | Cat#ATCC CRL-<br>10741 |
| HBB primers:<br>Fwd: 5'-CTC GCT TTC TTG CTG TCC A-3'<br>Rev: 5'-CAA GGC CCT TCA TAA TAT CCC C-3' | Integrated DNA<br>Technologies | N/A                    |
| ELANE primers:<br>Fwd: 5'-CTG CGT GGC GAA TGT AAA CG-3'<br>Rev: 5'-CGT TGA GCA AGT TTA CGG GG-3' | Integrated DNA<br>Technologies | N/A                    |
| GPMB primers:<br>Fwd: 5'-CTG ATC TCC GTT GGC TGC TT-3'<br>Rev: 5'-CTG ACC ACA TTC CCA GGA CT-3'  | Integrated DNA<br>Technologies | N/A                    |
| RPLP0 primers:<br>Fwd: 5'-TGGCAATCCCTGACGCACCG-3'<br>Rev: 5'-TGCCCATCAGCACACAGCC-3'              | Integrated DNA<br>Technologies | N/A                    |
| ACE 3 C8, 50x2.1mm, Ultra-Inert HPLC Column                                                      | MZ-Analysetechnik              | Cat#ACE-112-0502       |
| ACE 3 C8 Ultra-Inert HPLC Guard cartridge                                                        | MZ-Analysetechnik              | Cat#ACE-112-<br>0102GD |
| Rix-5Sil MS, 30 m L x 0.25 mm i.d., 0.25 µm film<br>thickness                                    | Restek GmbH                    | Cat#13623              |

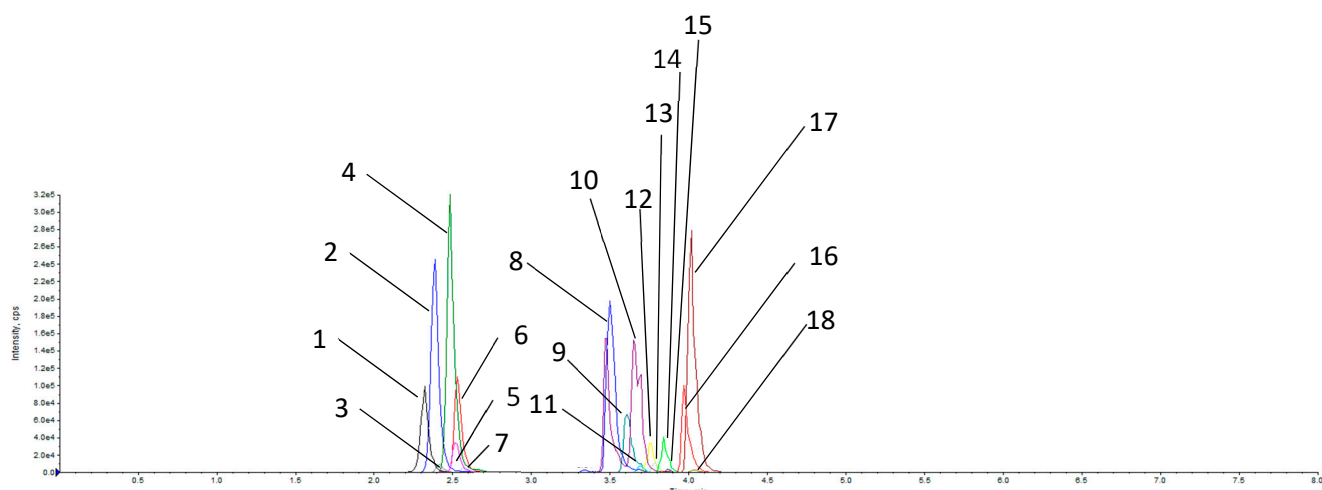

**Supplemental Figure S1.** Typical chromatogram obtained during separation of further sphingolipid analysis. Peaks correspond to the following analytes: **1** - lysoSM (d18:1), **2** -Sphingosine (d17:1), **3** - Sphingosine-1-Phosphate (d17:1), **4** - Sphingosine (d18:1), **5** - Sphingosine-1-Phosphate (d18:1), **6** - Sphinganine (d18:0), **7** - Sphinganine-1-Phosphate (d18:0), **8** - Sphingomyelin (d18:1/16:0), **9** - C15 Ceramide, **10** - C16 Ceramide, **11** - C16 Dihydroceramide, **12** - C18 Ceramide, **13** - C18 Dihydroceramide, **14** - C20 Ceramide, **15** - C20 Dihydroceramide, **16** - C24 Ceramide (d17:1), **17** - C24 Ceramide, **18** - C24 Dihydroceramide.

**Supplemental Table S2.** Analyte parameters for the applied ceramide quantification method.

| Analyte                    | Retention time | m/z pair    | Internal Standard              | DP  | CE | CXP |
|----------------------------|----------------|-------------|--------------------------------|-----|----|-----|
| Sphingosine                | 2.5            | 300.5/282.3 | Sphingosine(d17:1)             | 41  | 19 | 6   |
| Sphinganine                | 2.54           | 302.6/284.5 | Sphingosine(d17:1)             | 76  | 23 | 24  |
| Sphingosine-1-Phosphate    | 2.53           | 380.3/264.4 | Sphingosine-1-Phosphate(d17:1) | 71  | 21 | 18  |
| Sphinganine-1-Phosphate    | 2.59           | 382.3/284.5 | Sphingosine-1-Phosphate(d17:1) | 50  | 22 | 25  |
| C16 Ceramide               | 3.67           | 538.4/264.1 | C15 Ceramide                   | 70  | 30 | 15  |
| C16 Dihydroceramide        | 3.70           | 540.9/284.5 | C15 Ceramide                   | 126 | 47 | 12  |
| C18 Ceramide               | 3.76           | 567/264.4   | C15 Ceramide                   | 40  | 40 | 15  |
| C18 Dihydroceramide        | 3.79           | 569/284.5   | C15 Ceramide                   | 70  | 45 | 14  |
| C20 Ceramide               | 3.85           | 595.3/264.2 | C24 Ceramide (d17:1)           | 70  | 45 | 15  |
| C20 Dihydroceramide        | 3.88           | 597.3/284.5 | C24 Ceramide (d17:1)           | 121 | 47 | 16  |
| C24 Ceramide               | 4.02           | 650.8/264.2 | C24 Ceramide (d17:1)           | 86  | 43 | 14  |
| C24 Dihydroceramide        | 4.04           | 653.1/284.6 | C24 Ceramide (d17:1)           | 126 | 45 | 16  |
| Sphingomyelin (d18:1/16:0) | 3.52           | 704/184.2   | None                           | 150 | 12 | 15  |
| LysoSM (d18:1)             | 2.33           | 465.5/184.2 | None                           | 56  | 41 | 20  |

**Supplementary Table S3.** Summary of concentration ranges, LOD, LLOQ, recovery rates, intra-assay CV and inter-assay CV of the applied ceramide quantification method.

| Analyte                    | Concentration range (nM) | R <sup>2</sup><br>(extracted calibrators) | LOD<br>(S/N > 3) | LLOQ<br>(S/N >10) | Recovery<br>(standard) | Recovery<br>(cell extract) | Intra-assay<br>CV | Inter-Assay<br>CV |
|----------------------------|--------------------------|-------------------------------------------|------------------|-------------------|------------------------|----------------------------|-------------------|-------------------|
| Sphingosine                | 1.67 - 835               | 0.97                                      | 3.34             | 3.34              | 78,57%                 | 84,07%                     | 18.15%            | 15.31%            |
| Sphinganine                | 1.66 - 829               | 0.98                                      | 3.32             | 3.32              | 79,26%                 | 88,09%                     | 13.14%            | 14.04%            |
| Sphingosine-1-Phosphate    | 2.64 – 1318              | 0.97                                      | 2.64             | 2.64              | 101,73%                | 73,39%                     | 14.83%            | 6.09%             |
| Sphinganine-1-Phosphate    | 13.1 – 1311              | 0.99                                      | 13.1             | 13.1              | 83,43%                 | 63,16%                     | 12.62%            | 4.86%             |
| C16 Ceramide               | 1.86 – 930               | 0.98                                      | 1.86             | 1.86              | 96,26%                 | 76,12%                     | 12.00%            | 22.57%            |
| C16 Dihydroceramide        | 1.85 – 926               | 0.96                                      | 1.85             | 1.85              | 103,16%                | 19,09%                     | 17.35%            | 14.71%            |
| C18 Ceramide               | 1.77 – 883               | 0.98                                      | 1.77             | 1.77              | 134,63%                | 88,7%                      | 16.41%            | 17.03%            |
| C18 Dihydroceramide        | 1.76 – 880               | 0.97                                      | 1.76             | 1.76              | 119,98%                | 110,38%                    | 14.76%            | 6.57%             |
| C20 Ceramide               | 1.68 – 842               | 0.94                                      | 1.68             | 1.68              | 109,62%                | 83,98%                     | 20.02%            | 30.56%            |
| C20 Dihydroceramide        | 1.68 – 839               | 0.93                                      | 1.68             | 10                | 97,17%                 | 107,41%                    | 22.31%            | 10.85%            |
| C24 Ceramide               | 6.15 – 3076              | 0.95                                      | 6.15             | 6.15              | 71,17%                 | 61,19%                     | 16.86%            | 6.98%             |
| C24 Dihydroceramide        | 1.53 – 767               | 0.98                                      | 1.53             | 30.76             | 66,1%                  | 51,95%                     | 30.45%            | 37.67%            |
| Sphingomyelin (d18:1/16:0) | 284.48 – 142242          | 0.97                                      | 284.48           | 284.48            | 84,14%                 | 135,42%                    | 13.01%            | 15.45%            |
| LysoSM (d18:1)             | 2.15 - 1076              | 0.99                                      | 2.15             | 2.15              | 86,99%                 | 91,02%                     | 13.58%            | 27.56%            |

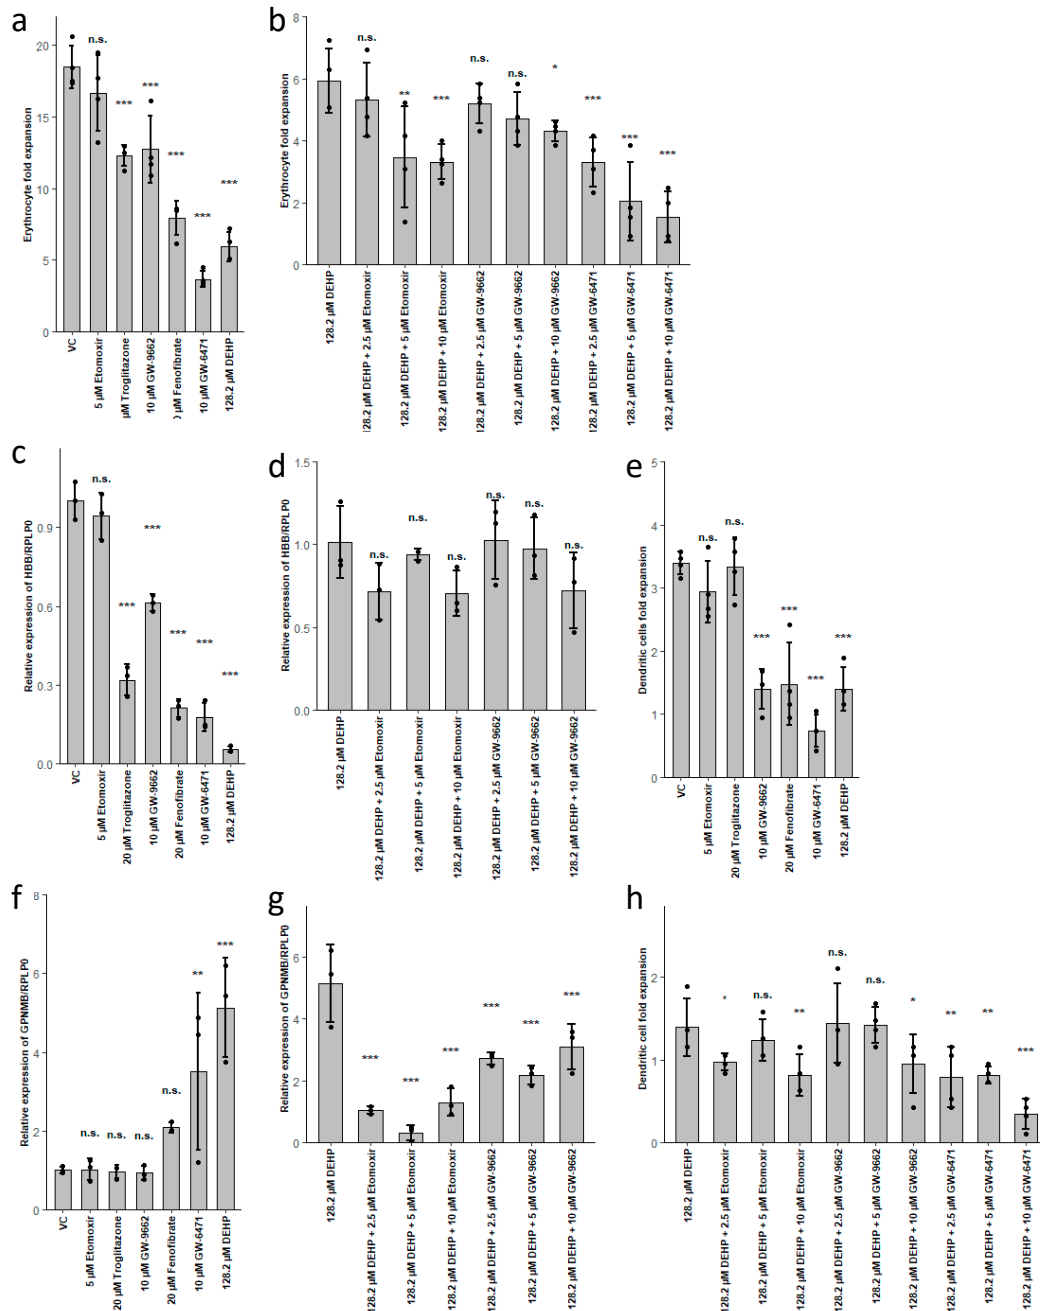

**Supplemental Figure S2.** The effects of DEHP are not mediated via modulation of PPAR $\alpha/\gamma$  or fatty acid oxidation. (a) Expansion of erythrocytes, treated with etomoxir, troglitazone, GW-9662, Fenofibrate, GW-6471 or DEHP. (b) Expansion of erythrocytes in presence of DEHP alone, or DEHP in combination with different concentrations of etomoxir, GW-9662 or GW-6471. (c) HBB/RPLP0 expression of erythrocytes, treated with etomoxir, troglitazone, GW-9662, Fenofibrate, GW-6471 or DEHP. (d) HBB/RPLP0 expression of erythrocytes in presence of DEHP alone, or DEHP in combination with different concentrations of etomoxir or GW-9662. From samples, treated with DEHP and GW-6471, no total RNA could be extracted. (e) Expansion of dendritic cells, treated with etomoxir, troglitazone, GW-9662, Fenofibrate, GW-6471 or DEHP. (f) GPNMB/RPLP0 expression of dendritic cells, treated with etomoxir, troglitazone, GW-9662, Fenofibrate, GW-6471 or DEHP. (g) GPNMB/RPLP0 expression of dendritic cells in presence of DEHP alone, or DEHP in combination with different concentrations of etomoxir or GW-9662. From samples, treated with DEHP and GW-6471, no total RNA could be extracted. (h) Expansion of dendritic cells in presence of DEHP alone, or DEHP in combination with different concentrations of etomoxir, GW-9662 or GW-6471.
